# Supplementary material
Source: HighWire-hosted journal article supplement (https://www.cmajopen.ca/highwire/filestream/80972/field_highwire_adjunct_files/0/open-2016-0036-1-at.pdf)
Supplement: open-2016-0036-1-at.pdf [file open-2016-0036-1-at.pdf]

**Appendix 1 (as supplied by the authors): The process flow used for selecting risk estimates used in this project**

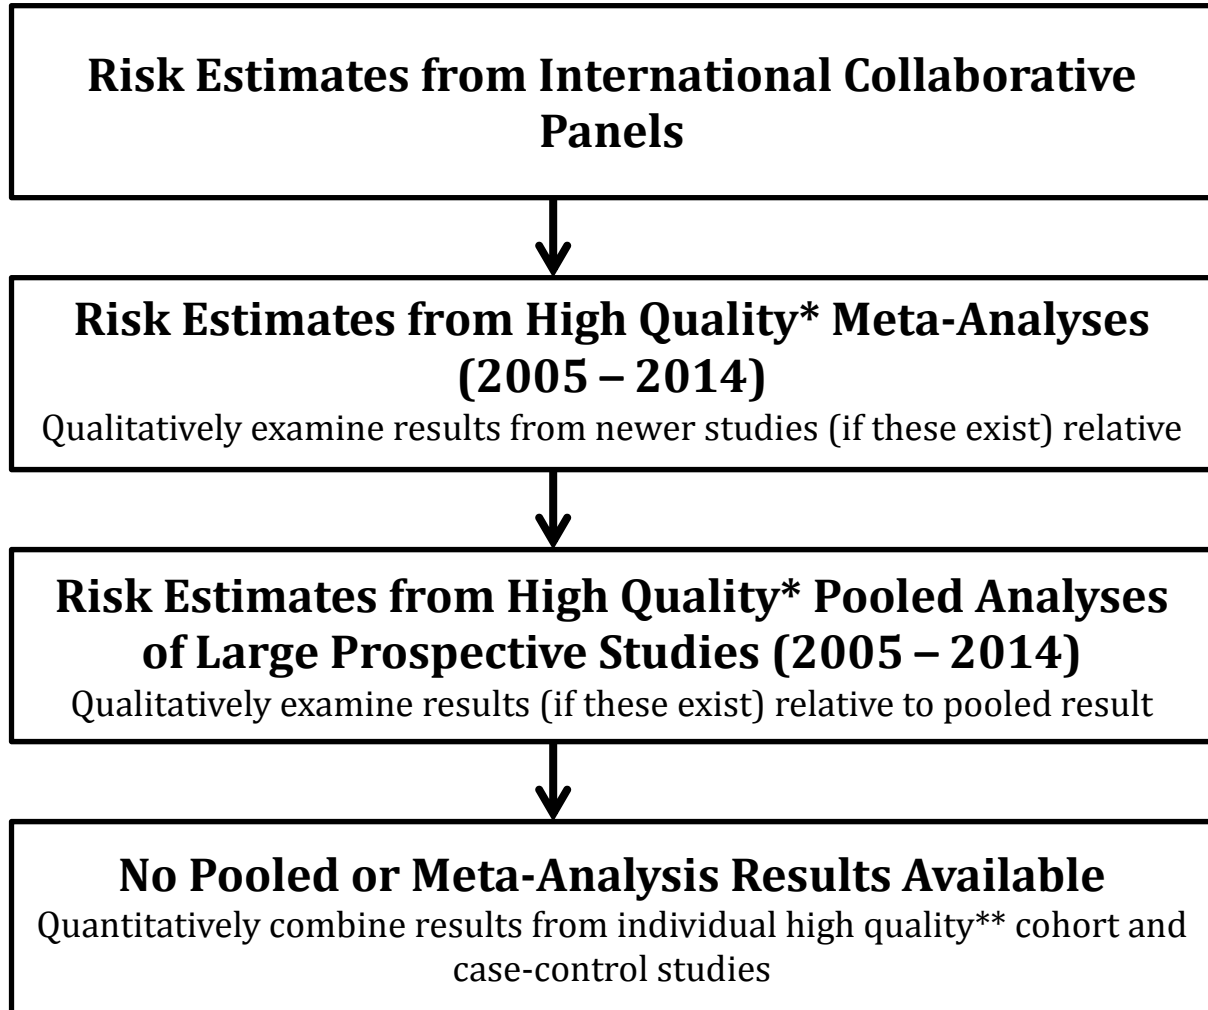

\*Quality determined using STrengthening the Reporting of OBservational studies in Epidemiology (STROBE) guidelines for cohort and case-control studies and Meta-analysis Of Observational Studies in Epidemiology (MOOSE) guidelines for meta-analysis

Published in: Grundy A, Friedenreich CM, Poirier AE, et al. A methodologic framework to evaluate the number of cancers attributable to lifestyle and environment in Alberta, Canada. *CMAJ Open* 2016;3:E471-78.. Reproduced with permission from *CMAJ Open*.

Appendix to: Grundy A, Poirier AR, Khandwala F, et al. Cancer incidence attributable to red and processed meat consumption in Alberta in 2012. *CMAJ Open* 2016.  
DOI:10.9778/cmajo.20160036. Copyright © 2016 The Author(s) or their employer(s).  
To receive this resource in an accessible format, please contact us at [cmajgroup@cmaj.ca](mailto:cmajgroup@cmaj.ca).
